# Supplementary material for: Effectiveness of the Baby Friendly Community Initiative in Italy: a non-randomised controlled study
Source: PubMed Central journal article supplement — BMJ Open. 2016 May 6;6(5):e010232. doi: 10.1136/bmjopen-2015-010232 (PMC4861096; doi:10.1136/bmjopen-2015-010232), 2016-05-06
Supplement: bmjopen-2015-010232supp_tables.pdf [file bmjopen-2015-010232supp_tables.pdf]

## Appendix

Table A1. Subjects enrolled and followed up to 12 months by LHA in the early and late intervention groups and by round of data collection

| Group              | LHA | Assigned sample size | Round 1<br>(01/09/09-31/03/10) |              |      | Round 2<br>(01/09/10-31/03/11) |              |      | Round 3<br>(01/09/11-31/03/12) |              |      | Total    |              |      |
|--------------------|-----|----------------------|--------------------------------|--------------|------|--------------------------------|--------------|------|--------------------------------|--------------|------|----------|--------------|------|
|                    |     |                      | Enrolled                       | F-up<br>12 m | Loss | Enrolled                       | F-up<br>12 m | Loss | Enrolled                       | F-up<br>12 m | Loss | Enrolled | F-up<br>12 m | Loss |
| Early intervention | 5   | 124                  | 124                            | 103          | 17%  | 126                            | 115          | 9%   | 129                            | 116          | 10%  | 379      | 334          | 12%  |
|                    | 6   | 48                   | 48                             | 38           | 21%  | 47                             | 43           | 9%   | 47                             | 42           | 11%  | 142      | 123          | 13%  |
|                    | 8   | 54                   | 56                             | 52           | 7%   | 61                             | 55           | 10%  | 58                             | 50           | 14%  | 175      | 157          | 10%  |
|                    | 9   | 121                  | 122                            | 99           | 19%  | 122                            | 93           | 23%  | 123                            | 105          | 15%  | 367      | 297          | 19%  |
|                    | 10  | 109                  | 109                            | 91           | 17%  | 112                            | 105          | 5%   | 113                            | 99           | 12%  | 334      | 295          | 12%  |
|                    | 14  | 122                  | 120                            | 96           | 20%  | 117                            | 102          | 13%  | 122                            | 109          | 11%  | 359      | 307          | 14%  |
|                    | 15  | 126                  | 126                            | 117          | 7%   | 127                            | 111          | 13%  | 126                            | 107          | 15%  | 379      | 335          | 12%  |
|                    | 16  | 134                  | 134                            | 121          | 10%  | 135                            | 122          | 10%  | 134                            | 119          | 11%  | 403      | 362          | 10%  |
|                    | 18  | 103                  | 103                            | 81           | 21%  | 103                            | 94           | 9%   | 103                            | 89           | 14%  | 309      | 264          | 15%  |
| Total              | 942 | 942                  | 798                            | 15%          | 949  | 840                            | 11%          | 955  | 836                            | 12%          | 2846 | 2474     | 13%          |      |
| Late intervention  | 1   | 136                  | 139                            | 117          | 16%  | 142                            | 125          | 12%  | 140                            | 122          | 13%  | 421      | 364          | 14%  |
|                    | 2   | 85                   | 94                             | 77           | 18%  | 101                            | 92           | 9%   | 100                            | 88           | 12%  | 295      | 257          | 13%  |
|                    | 3   | 50                   | 51                             | 37           | 27%  | 49                             | 42           | 14%  | 47                             | 40           | 15%  | 147      | 119          | 19%  |
|                    | 4   | 143                  | 147                            | 131          | 11%  | 142                            | 133          | 6%   | -                              | -            | -    | 289      | 264          | 9%   |
|                    | 7   | 115                  | 129                            | 101          | 22%  | -                              | -            | -    | 130                            | 118          | 9%   | 259      | 219          | 15%  |
|                    | 11  | 62                   | 61                             | 54           | 11%  | 61                             | 49           | 20%  | 62                             | 53           | 15%  | 184      | 156          | 15%  |
|                    | 12  | 68                   | 68                             | 56           | 18%  | 67                             | 52           | 22%  | 69                             | 55           | 20%  | 204      | 163          | 20%  |
|                    | 13  | 43                   | 53                             | 50           | 6%   | 53                             | 43           | 19%  | 51                             | 43           | 16%  | 157      | 136          | 13%  |
|                    | 17  | 97                   | 97                             | 89           | 8%   | 98                             | 80           | 18%  | 97                             | 84           | 13%  | 292      | 253          | 13%  |
| Total              | 799 | 839                  | 712                            | 15%          | 713  | 616                            | 14%          | 696  | 603                            | 13%          | 2248 | 1931     | 14%          |      |
| Grand total        |     | 1741                 | 1781                           | 1510         | 15%  | 1662                           | 1456         | 12%  | 1651                           | 1439         | 13%  | 5094     | 4405         | 14%  |

Table A2. Adjusted rates of breastfeeding (AR) and odd ratios (OR), with their respective 95% confidence intervals (95% CI), by early and late intervention groups and round of data collection. Late intervention group at round 1 of data collection as comparator. Statistically significant differences ( $p < 0.05$ ) in bold.

| Breastfeeding indicators       | Round of data collection | Early intervention group |            |      |                  | Late intervention group |            |      |                  |
|--------------------------------|--------------------------|--------------------------|------------|------|------------------|-------------------------|------------|------|------------------|
|                                |                          | AR (%)                   | 95% CI (%) | OR   | 95% CI           | AR (%)                  | 95% CI (%) | OR   | 95% CI           |
| EBF at discharge (recall 24 h) | 1                        | 87.2                     | 83.4-91.1  | 1.03 | 0.62-1.70        | 86.9                    | 82.7-91.1  | 1    | -                |
|                                | 2                        | 88.4                     | 84.8-92.1  | 1.15 | 0.69-1.91        | 85.6                    | 80.9-90.2  | 0.89 | 0.61-1.31        |
|                                | 3                        | 87.4                     | 83.5-91.3  | 1.04 | 0.63-1.74        | 86.4                    | 82.0-90.8  | 0.96 | 0.65-1.40        |
| EBF at discharge (from birth)  | 1                        | 72.2                     | 62.0-82.5  | 1.36 | 0.66-2.76        | 65.7                    | 54.0-77.5  | 1    | -                |
|                                | 2                        | 73.6                     | 63.6-83.6  | 1.45 | 0.71-2.96        | 70.2                    | 59.1-81.2  | 1.23 | 0.90-1.67        |
|                                | 3                        | 73.1                     | 63.0-83.2  | 1.41 | 0.69-2.89        | 73.5                    | 63.3-83.8  | 1.45 | <b>1.05-1.99</b> |
| EBF at 3 months (recall 24 h)  | 1                        | 57.7                     | 52.6-62.8  | 1.13 | 0.86-1.49        | 54.7                    | 49.2-60.2  | 1    | -                |
|                                | 2                        | 57.1                     | 51.9-62.3  | 1.10 | 0.83-1.45        | 54.5                    | 48.8-60.2  | 0.99 | 0.79-1.25        |
|                                | 3                        | 61.8                     | 56.8-66.9  | 1.34 | 1.01-1.77        | 58.1                    | 52.4-63.7  | 1.15 | 0.90-1.46        |
| EBF at 3 months (recall 7 d)   | 1                        | 48.6                     | 42.9-54.3  | 1.13 | 0.82-1.55        | 45.6                    | 39.7-51.6  | 1    | -                |
|                                | 2                        | 52.0                     | 46.3-57.7  | 1.29 | 0.94-1.78        | 51.4                    | 45.2-57.6  | 1.26 | <b>1.00-1.58</b> |
|                                | 3                        | 54.9                     | 49.2-60.6  | 1.45 | <b>1.05-2.00</b> | 51.4                    | 45.1-57.6  | 1.26 | 0.99-1.59        |
| EBF at 6 months (recall 24 h)  | 1                        | 8.6                      | 5.6-11.7   | 1.17 | 0.67-2.05        | 7.4                     | 4.6-10.3   | 1    | -                |
|                                | 2                        | 7.3                      | 4.6-9.9    | 0.98 | 0.55-1.71        | 8.3                     | 5.1-11.5   | 1.13 | 0.77-1.65        |
|                                | 3                        | 7.3                      | 4.6-9.9    | 0.97 | 0.55-1.71        | 9.3                     | 5.8-12.8   | 1.27 | 0.86-1.87        |
| EBF at 6 months (recall 7 d)   | 1                        | 5.2                      | 3.0-7.3    | 0.93 | 0.50-1.73        | 5.5                     | 3.2-7.9    | 1    | -                |
|                                | 2                        | 5.2                      | 3.1-7.3    | 0.93 | 0.50-1.72        | 6.7                     | 3.9-9.5    | 1.22 | 0.80-1.84        |
|                                | 3                        | 5.0                      | 2.9-7.1    | 0.90 | 0.49-1.66        | 7.1                     | 4.1-10.0   | 1.30 | 0.85-1.98        |
| ABF at 6 months (recall 24 h)  | 1                        | 67.8                     | 63.1-72.6  | 1.18 | 0.94-1.48        | 64.1                    | 58.9-69.3  | 1    | -                |
|                                | 2                        | 66.9                     | 62.1-71.7  | 1.13 | 0.90-1.42        | 63.7                    | 58.3-69.1  | 0.98 | 0.77-1.24        |
|                                | 3                        | 69.1                     | 64.4-73.8  | 1.25 | 0.99-1.57        | 66.5                    | 61.2-71.9  | 1.11 | 0.87-1.42        |
| ABF at 12 months (recall 24 h) | 1                        | 32.0                     | 27.2-36.8  | 1.12 | 0.86-1.45        | 29.7                    | 24.8-34.5  | 1    | -                |
|                                | 2                        | 34.8                     | 29.9-39.6  | 1.26 | 0.98-1.63        | 31.1                    | 26.0-36.2  | 1.07 | 0.84-1.37        |
|                                | 3                        | 35.9                     | 31.0-40.9  | 1.33 | <b>1.03-1.72</b> | 34.8                    | 29.4-40.1  | 1.26 | 0.98-1.62        |

Table A3. Adjusted rates of breastfeeding (AR) and odd ratios (OR), with their respective 95% confidence intervals (95% CI), by compliance with the intervention and round of data collection. Non-compliance group at round 1 of data collection as comparator. Statistically significant differences (p<0.05) in bold.

| Breastfeeding indicators       | Round of data collection | Compliance group |            |      |                  | Non-compliance group |            |      |                  |
|--------------------------------|--------------------------|------------------|------------|------|------------------|----------------------|------------|------|------------------|
|                                |                          | AR (%)           | 95% CI (%) | OR   | 95% CI           | AR (%)               | 95% CI (%) | OR   | 95% CI           |
| EBF at discharge (recall 24 h) | 1                        | 87.2             | 83.5-90.8  | 1.02 | 0.60-1.75        | 86.9                 | 82.1-91.8  | 1    | -                |
|                                | 2                        | 86.9             | 83.2-90.6  | 0.99 | 0.58-1.70        | 88.0                 | 83.3-92.7  | 1.10 | 0.71-1.71        |
|                                | 3                        | 87.9             | 84.4-91.4  | 1.09 | 0.64-1.88        | 84.9                 | 79.5-90.3  | 0.85 | 0.55-1.30        |
| EBF at discharge (from birth)  | 1                        | 70.3             | 60.4-80.2  | 1.16 | 0.53-2.50        | 67.2                 | 53.9-80.5  | 1    | -                |
|                                | 2                        | 69.6             | 59.6-79.6  | 1.12 | 0.52-2.41        | 76.2                 | 64.9-87.4  | 1.56 | 1.09-2.23        |
|                                | 3                        | 72.2             | 62.7-81.7  | 1.27 | 0.59-2.75        | 74.5                 | 62.9-86.0  | 1.42 | 1.00-2.04        |
| EBF at 3 months (recall 24 h)  | 1                        | 60.5             | 56.9-64.2  | 1.64 | <b>1.26-2.13</b> | 48.3                 | 43.3-53.4  | 1    | -                |
|                                | 2                        | 58.3             | 54.6-62.0  | 1.49 | <b>1.15-1.93</b> | 51.4                 | 46.1-56.7  | 1.13 | 0.88-1.46        |
|                                | 3                        | 63.4             | 59.9-67.0  | 1.85 | <b>1.43-2.41</b> | 54.6                 | 49.4-59.8  | 1.28 | 0.99-1.67        |
| EBF at 3 months (recall 7 d)   | 1                        | 50.4             | 45.7-55.1  | 1.42 | <b>1.03-1.95</b> | 41.8                 | 35.8-47.8  | 1    | -                |
|                                | 2                        | 53.4             | 48.7-58.0  | 1.60 | <b>1.16-2.19</b> | 48.8                 | 42.4-55.2  | 1.33 | <b>1.03-1.72</b> |
|                                | 3                        | 56.2             | 51.6-60.9  | 1.79 | <b>1.30-2.46</b> | 48.5                 | 42.1-54.8  | 1.31 | <b>1.01-1.71</b> |
| EBF at 6 months (recall 24 h)  | 1                        | 9.6              | 6.6-12.5   | 1.67 | 0.93-3.01        | 5.9                  | 3.3-8.6    | 1    | -                |
|                                | 2                        | 8.1              | 5.5-10.6   | 1.38 | 0.77-2.49        | 7.7                  | 4.3-11.0   | 1.31 | 0.83-2.08        |
|                                | 3                        | 9.2              | 6.3-12.0   | 1.60 | 0.89-2.88        | 6.4                  | 3.5-9.3    | 1.08 | 0.66-1.76        |
| EBF at 6 months (recall 7 d)   | 1                        | 6.1              | 3.8-8.3    | 1.39 | 0.72-2.67        | 4.4                  | 2.2-6.7    | 1    | -                |
|                                | 2                        | 6.1              | 3.8-8.3    | 1.39 | 0.73-2.67        | 5.8                  | 2.9-8.7    | 1.32 | 0.80-2.19        |
|                                | 3                        | 6.7              | 4.3-9.2    | 1.55 | 0.81-2.98        | 4.5                  | 2.1-6.8    | 1.01 | 0.59-1.73        |
| ABF at 6 months (recall 24 h)  | 1                        | 68.7             | 64.5-72.9  | 1.40 | <b>1.07-1.84</b> | 61.0                 | 55.4-66.6  | 1    | -                |
|                                | 2                        | 67.3             | 63.0-71.5  | 1.31 | <b>1.01-1.71</b> | 61.7                 | 55.9-67.5  | 1.03 | 0.79-1.34        |
|                                | 3                        | 70.1             | 66.0-74.3  | 1.50 | <b>1.15-1.97</b> | 64.0                 | 58.4-69.6  | 1.14 | 0.87-1.48        |
| ABF at 12 months (recall 24 h) | 1                        | 33.0             | 28.6-37.4  | 1.31 | 0.97-1.76        | 27.3                 | 22.2-32.5  | 1    | -                |
|                                | 2                        | 35.0             | 30.5-39.4  | 1.43 | <b>1.07-1.92</b> | 29.8                 | 24.3-35.4  | 1.13 | 0.86-1.50        |
|                                | 3                        | 37.2             | 32.6-41.7  | 1.57 | <b>1.17-2.11</b> | 32.5                 | 26.9-38.2  | 1.28 | 0.96-1.71        |
